# Supplementary material for: Complement-Mediated Regulation of Apolipoprotein E in Cultured Human RPE Cells
Source: PubMed Central journal article supplement — Invest Ophthalmol Vis Sci. 2017 Jul;58(7):3073–85. doi: 10.1167/iovs.16-20083 (PMC5482245; doi:10.1167/iovs.16-20083), 2017-07
Supplement: iovs-58-05-49_s01.pdf [file iovs-58-05-49_s01.pdf]

## SUPPLEMENTAL MATERIALS

**Figure S1.**

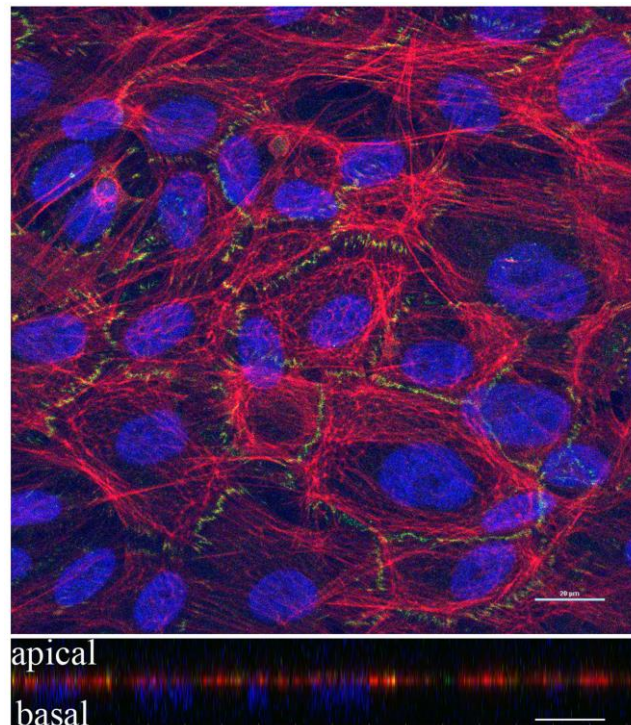

**Figure S1. RPE cells express ZO-1 and actin.** RPE cells from a 62-year-old donor with ApoE phenotype E3/E3 and CFHYY402 variant were cultured for 6 days, fixed in 4% PFA and co-stained with rabbit anti-ZO-1 (green) and phalloidin to detect actin (red). Blue stain corresponds to DAPI-stained nuclei. Twelve micrometer Z-stacks were captured. Confocal horizontal (X-Y) sections are shown in the upper panel and vertical (X-Z) sections are shown in lower panel. Data are representative of 2 separate experiments in 2 donors which showed similar results. Scale bar: 20 μm.

**Figure S2.**

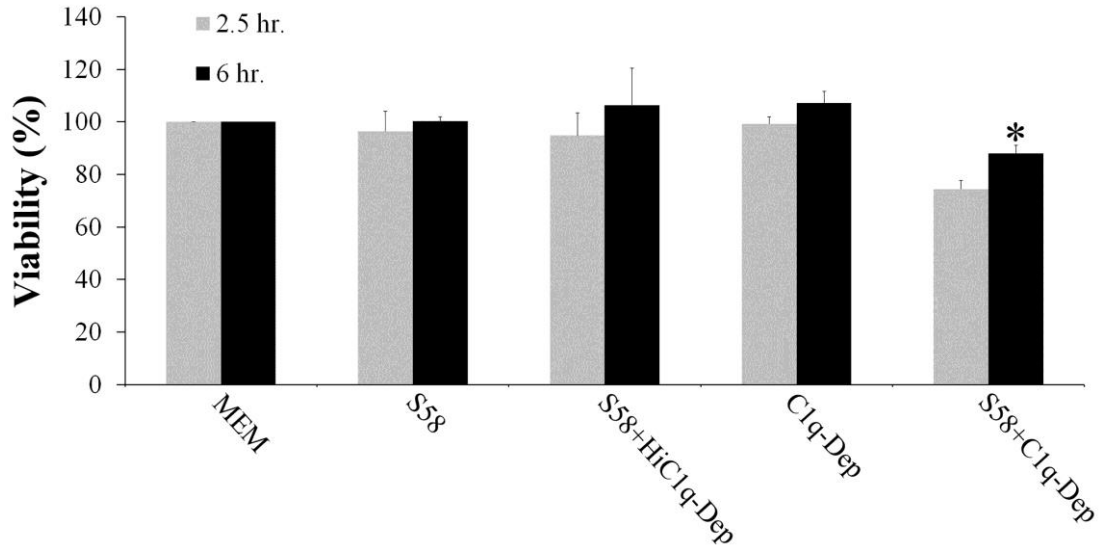

**Figure S2. Cell viability is not diminished at 6 hrs. relative to 2.5 hrs. after complement challenge.** RPE cells from a 62-year-old donor with ApoE phenotype E3/E3 and CFH<sub>YY402</sub> variant were plated in triplicate wells. Cells were grown to confluence, primed with or without S58 (1.2 mg/ml) for 30 minutes and then treated with either 6% C1q-Dep or 6% HiC1q-Dep for either 2.5 hrs. or 6 hrs. Cell viability was determined by WST-1 assay. \* P<0.05 vs 2.5 hrs. Data are averaged from 3 independent experiments. Similar results were observed in RPE cells from a 51-year-old donor.

**Figure S3.**

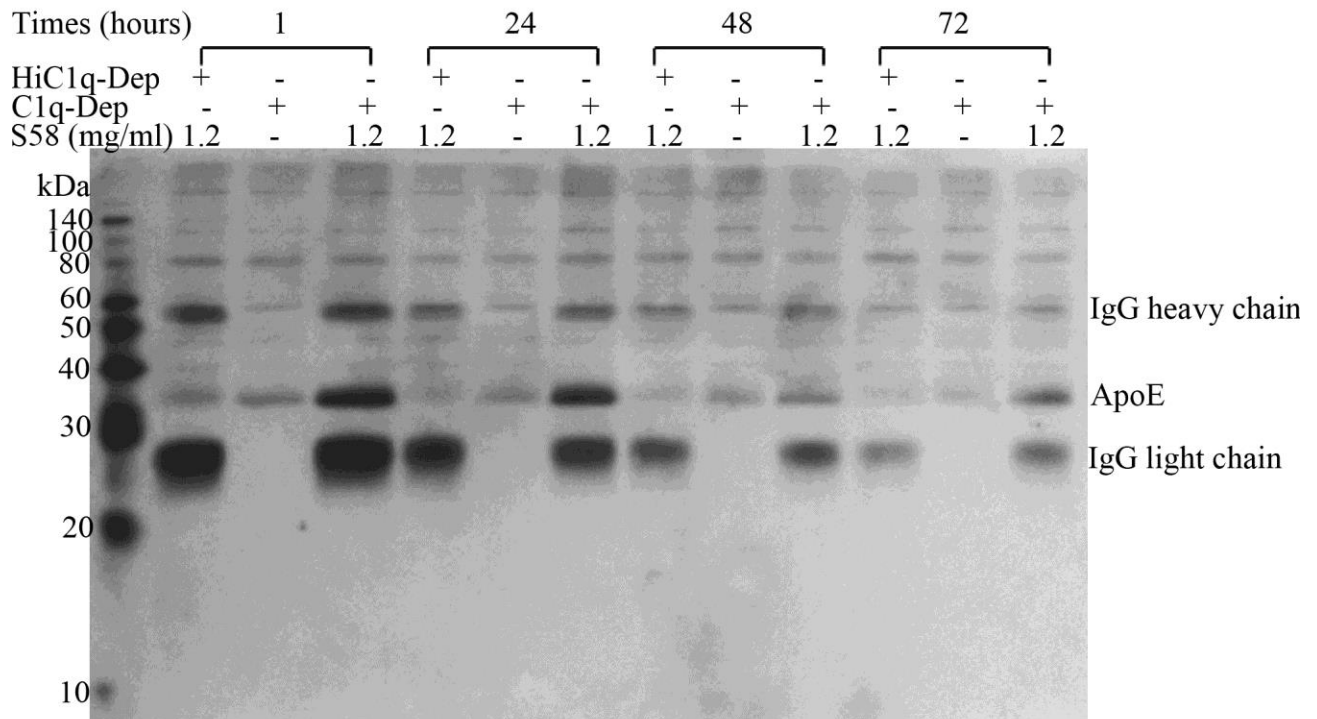

**Figure S3. Full blot of figure 9A.** RPE cells were primed with or without S58 (1.2 mg/ml) for 30 minutes and then treated with either 6% C1q-Dep or 6% HiC1q-Dep for 6 hrs. The media was then replaced with serum-free media. After media exchange, cultures were incubated for either 1, 24, 48 or 72 hrs. Total cellular lysate proteins (15  $\mu$ g) were separated by SDS-PAGE.
